# Supplementary material for: Evolutionary pathways of repeat protein topology in bacterial outer membrane proteins
Source: eLife journal article supplement (doi:10.7554/elife.40308), 2018-11-29
Supplement: fig2-data1 [file elife-40308-fig2-data1-v2.pdf]

| Average E-value, SeqID <= 25% |                 |                 |                 |                 |                 |                 |                 |
|-------------------------------|-----------------|-----------------|-----------------|-----------------|-----------------|-----------------|-----------------|
| Strands per Chain             | 8               | 10              | 12              | 14              | 16              | 18              | 22              |
| 8                             | <b>6.40e-15</b> | 4.43e-05        | 1.69e-06        | 1.83e-06        | 3.11e-05        |                 |                 |
| 10                            | NA              | <b>1.10e-14</b> | 1.41e-04        | 9.40e-04        | NA              | NA              | NA              |
| 12                            |                 |                 | <b>4.40e-27</b> | 1.39e-04        | 7.49e-06        |                 | 6.16e-04        |
| 14                            | NA              | NA              | NA              | <b>1.61e-35</b> | 6.89e-11        | NA              | 1.23e-04        |
| 16                            |                 |                 |                 |                 | <b>6.53e-37</b> | 2.29e-05        |                 |
| 18                            | NA              | NA              | NA              | NA              | NA              | <b>6.12e-32</b> | NA              |
| 22                            |                 |                 |                 |                 |                 |                 | <b>3.13e-52</b> |
