# Supplementary material for: Evolutionary pathways of repeat protein topology in bacterial outer membrane proteins
Source: eLife journal article supplement (doi:10.7554/elife.40308), 2018-11-29
Supplement: fig4-data1 [file elife-40308-fig4-data1-v2.pdf]

### 8- to 10-stranded Longest Alignment, IntNum 1356

|        |     |                          |                           |                    |                      |     |
|--------|-----|--------------------------|---------------------------|--------------------|----------------------|-----|
| 3qra A | 2   | EGESSISIGYAQSRV          | KEDGYKL                   | DKNPR...GFNLKYRYEF | NND..WGVIGSFAQTRRGFE | 56  |
| 2vdf A | 7   | ANETVHTDLSSISST          | RAF..L                    | KEKHKAACHIGVRADI   | PFDA                 | 64  |
| 3qra A | 57  | ESVDG.....FK.LI          | DGDFKYYSVTAGPVFRI         | ..NE..             | YVSLYGLLGAGHGKAKFS   | 102 |
| 2vdf A | 65  | NLETDENKLGK              | TKNVKLPTGVPENRIDLYTGYTYTQ | TLSDS              | LNFRVGAGLGFESSKDSIK  | 124 |
| 3qra A | 103 | S.IFGQSESRSKTSLAYGAGLQFN | PHP                       | NFVIDASYEY         | 138                  |     |
| 2vdf A | 125 | TTKHTLHSSRQSWLAKVHADLLS  | QLGNGWYINPWSEV            | 161                |                      |     |

### 8- to 12-stranded Longest Alignment, IntNum 703

|        |     |                        |                                         |                                        |                      |     |
|--------|-----|------------------------|-----------------------------------------|----------------------------------------|----------------------|-----|
| 2maf A | 8   | GPYVQADL               | AYAYEHITHDYPEPTAPNKNKISTVSDYFRNIRTRSVHP | RVSVGYD                                | FG...G               | 64  |
| 1uyn X | 120 | IGYLGKLF               | SYGRYKNSISRST                           | G                                      | EHAEGSVNGTLMQLGALGGV | 170 |
| 2maf A | 65  | WRIAADYA               | .RYRKWNNNKYSVNIENVRIRKENGIRIDRKTENQE    | .NGTFHA.                               | VSSLGLSA             | 121 |
| 1uyn X | 171 | GDLTVEGGLRYDLLKQDAFAEK | GSAL.....G                              | WSGNSLTEGTLVGLAGLKL                    |                      | 216 |
| 2maf A | 122 | IYDFQINDKFK            | KPYIGARVAYGH                            | VRHSIDSTKKTIEVTTVPSNAPNGAVTTYNTDPKTQND |                      | 181 |
| 1uyn X | 217 | SQPLIS..DK             | AVLFATAGVER                             | DLNGRDYTVTGG...F.....TGATAATGK         |                      | 256 |
| 2maf A | 182 | YQSNSIRRV              | GLGVIAGVGFDITP                          | KLTL DAGYRYHN                          | WGRLNTRFKTHEA        | 238 |
| 1uyn X | 257 | TGARMPHT               | RLVAGLGADV                              | EFGNGW                                 | NGLARYSYA.GSK....QYG | 308 |

### 8- to 14-stranded Longest Alignment, IntNum 1494

|        |     |                        |                                       |                    |                           |     |
|--------|-----|------------------------|---------------------------------------|--------------------|---------------------------|-----|
| 2x27 X | 4   | GHKAGD                 | FIIRGGFATVDPDDSSSDIK                  | LDGAKQRGT          | KATVDSDTQLGLTFTY..MFAD.KW | 60  |
| 4d5b A | 162 | NDYNM                  | GFYSNLEYLLSKEDRNAW.....G              | KRQEQGYSALFKPKYKRF | GNWEV                     | 207 |
| 2x27 X | 61  | GVELVAATPFNHQVDV       | KGLGPGLD                              | GKLADIKQLPPTLLLQYY | PMGGTNSAF                 | 120 |
| 4d5b A | 208 | GVEFYQIKT.NDEK         | QPDG...TINEKSDFNERYIEPIVQYS           | FD....DAG          | TLYTRVRVG                 | 259 |
| 2x27 X | 121 | YTTFFDED               | LASNKRAQGFSSMKLQDSWGLA....GELGFDYMLNE | HALFNMAVWYMDID     |                           | 175 |
| 4d5b A | 260 | KNETKNTDRS.....GGGNAGI | NYFKDIRKATVGYEQST                     | GES                | WVAKAEYAYANEV             | 309 |
| 2x27 X | 176 | TKAS.INGPSALGVNK       | TKVDVDVDPWVYMIGFGYKF                  | 210                |                           |     |
| 4d5b A | 310 | EKKSR                  | LSG.....WEARNK                        | SELTQHTFYAQAALYRF  | 339                       |     |

### 8- to 16-stranded Longest Alignment, IntNum 529

|        |     |              |                   |                |                          |     |
|--------|-----|--------------|-------------------|----------------|--------------------------|-----|
| 1qj8 A | 3   | STVTGGYAQSDA | QGG.....Q         | MNKMGGFNLKYRYE | EDNSPL                   | 54  |
| 5fvn A | 188 | FGIGTAVSSSK  | RRTSSQNDLTYGNGDRA | AEITYTGGLKYD   | ANN...IYLAAQYTQTYNATRVG. | 244 |

|        |     |    |                   |    |                     |             |                 |     |
|--------|-----|----|-------------------|----|---------------------|-------------|-----------------|-----|
| 1qj8 A | 55  | GD | YNKNQYYGITAGPAYRI | ND | WASIYGVVGVGYGKFQTT  | EYPTYK      | NDTSDYGFSGYAGLQ | 114 |
| 5fvn A | 245 | NL | GWANKAQNFVVAQQY   | Q  | FDFGLRPSVA..YLQSKGK | DLEN...GYGD | QDLLKYVDVGAT    | 299 |

  

|        |     |   |                  |                  |              |     |
|--------|-----|---|------------------|------------------|--------------|-----|
| 1qj8 A | 115 | F | NPMENVALDFSIEQSR | IRS.....VD       | VGTWIAGVGYRF | 148 |
| 5fvn A | 300 | Y | YFNKNMSTYVDYKINL | LDDKEFTRNAGISTDD | I VALGLVYQF  | 342 |

#### 10- to 12-stranded Longest Alignment, IntNum 1348

|        |     |   |               |       |    |             |            |               |    |   |               |     |
|--------|-----|---|---------------|-------|----|-------------|------------|---------------|----|---|---------------|-----|
| 2vdf A | 30  | H | KAAKHIGVRADIP | FDAN  | NQ | GIRLEAGFGRS | KKNINLETDE | NKL           | GK | T | KNVKLPTGVPENR | 89  |
| 3aeh A | 105 | K | TKSWGGGFYASGI | FRSGA | Y  | FDVIAKYIH   | NENKYD     | LNFA.....GAGK | Q  | N | FRSHS         | 154 |

  

|        |     |   |               |       |   |                  |             |                   |   |   |            |     |
|--------|-----|---|---------------|-------|---|------------------|-------------|-------------------|---|---|------------|-----|
| 2vdf A | 90  | . | IDLYTGYTYTQ   | TLSDS | L | NFRVGAGLGFESSKDS | IKTTK...HTL | H                 | S | . | SR.QSWLAKV | 141 |
| 3aeh A | 155 | L | YAGAEVGYRYH.. | LTD   | T | TFVEPQAE         | L VWGRLQGQ  | TFNWNDSGMDVSMRRNS | V | N | PLVGRT     | 212 |

  

|        |     |   |              |                     |   |              |                       |    |   |   |            |         |     |
|--------|-----|---|--------------|---------------------|---|--------------|-----------------------|----|---|---|------------|---------|-----|
| 2vdf A | 142 | H | ADLLSQLGN.GW | YINPWSEVKFDLNSRYKLN | T | GV           | TNLK                  | KD | I | . | NQKTNGWGFG | LGANIGK | 199 |
| 3aeh A | 213 | G | VVSGKTFSGKDW | S                   | L | TARAGLHYEFDL | TDSADVHLKDAAGEHQINGRK | D  | S | R | MLYGVGLNA  | 272     |     |

  

|        |     |   |       |   |   |         |     |   |   |   |   |   |   |   |     |
|--------|-----|---|-------|---|---|---------|-----|---|---|---|---|---|---|---|-----|
| 2vdf A | 200 | K | LGESA | S | I | EAGPFYK | 214 |   |   |   |   |   |   |   |     |
| 3aeh A | 273 | R | FGD   | N | T | R       | L   | G | L | E | V | E | R | S | 287 |

#### 12- to 14-stranded Longest Alignment, IntNum 712

|        |    |   |   |   |   |   |   |   |   |   |   |   |   |   |   |   |   |   |   |   |   |   |   |   |   |   |   |   |   |   |   |   |   |   |   |   |   |   |   |   |    |   |   |   |   |   |   |   |   |   |   |   |   |   |   |   |   |   |   |    |    |
|--------|----|---|---|---|---|---|---|---|---|---|---|---|---|---|---|---|---|---|---|---|---|---|---|---|---|---|---|---|---|---|---|---|---|---|---|---|---|---|---|---|----|---|---|---|---|---|---|---|---|---|---|---|---|---|---|---|---|---|---|----|----|
| 1uyn X | 39 | N | G | T | G | L | R | V | I | A | Q | T | Q | D | G | G | T | W | E | Q | G | G | V | E | G | K | M | R | G | S | T | Q | T | V | G | I | A | A | K | T | .. | G | E | N | T | T | A | A | A | T | L | G | M | G | R | S | T | W | S | 96 |    |
| 2x9k A | 39 | A | N | G | P | W | R | I | A | L | A | Y | Y | Q | E | G | P | . | V | D | Y | S | A | G | K | R | G | T | W | F | D | R | P | E | L | V | H | Y | Q | F | L  | E | N | D | D | F | S | F | G | L | T | G | G | F | R | N | Y | G | Y | H  | 97 |

  

|        |    |   |   |    |   |   |    |   |   |   |   |   |   |   |   |   |   |   |   |   |   |   |   |   |   |   |   |   |   |   |   |   |   |   |   |   |   |   |   |   |   |   |   |   |   |       |   |   |   |   |   |   |     |   |   |   |   |   |   |     |
|--------|----|---|---|----|---|---|----|---|---|---|---|---|---|---|---|---|---|---|---|---|---|---|---|---|---|---|---|---|---|---|---|---|---|---|---|---|---|---|---|---|---|---|---|---|---|-------|---|---|---|---|---|---|-----|---|---|---|---|---|---|-----|
| 1uyn X | 97 | E | N | .. | S | A | .. | N | A | K | T | D | S | I | S | L | F | A | G | I | R | H | D | A | G | D | I | G | Y | L | K | G | L | F | S | Y | G | R | Y | K | N | S | I | S | R | S     | T | G | A | D | E | H | A   | E | G | S | V | N | G | 152 |
| 2x9k A | 98 | Y | V | D  | E | P | G  | K | D | T | A | N | M | Q | R | W | K | I | A | P | D | W | D | V | K | L | T | D | L | R | F | N | G | W | L | S | M | Y | K | F | A | N | D | L | N | ..... | T | T | G | Y | A | D | 148 |   |   |   |   |   |   |     |

  

|        |     |   |   |    |   |   |   |   |   |   |   |   |   |   |   |   |   |   |   |   |   |   |   |   |   |   |   |   |   |       |   |   |   |   |   |   |       |   |   |   |   |   |   |   |   |   |   |   |   |   |   |     |   |   |   |   |   |   |   |   |     |
|--------|-----|---|---|----|---|---|---|---|---|---|---|---|---|---|---|---|---|---|---|---|---|---|---|---|---|---|---|---|---|-------|---|---|---|---|---|---|-------|---|---|---|---|---|---|---|---|---|---|---|---|---|---|-----|---|---|---|---|---|---|---|---|-----|
| 1uyn X | 153 | T | L | M  | Q | L | G | A | L | G | G | V | N | V | P | F | A | A | T | G | D | L | T | V | E | G | G | L | R | Y     | D | L | L | Q | D | A | F     | A | E | K | G | S | A | L | G | W | S | G | N | S | L | T   | E | G | T | L | V | G | L | A | 212 |
| 2x9k A | 149 | T | R | .. | V | E | T | E | T | G | L | Q | Y | T | F | N | E | T | V | A | L | R | V | N | Y | Y | L | E | R | ..... | G | F | N | M | D | D | ..... | S | R | N | N | G | E | F | S | T | Q | E | I | R | A | 195 |   |   |   |   |   |   |   |   |     |

  

|        |     |   |   |   |   |   |   |   |   |   |   |   |   |   |   |   |   |   |   |   |   |   |   |   |   |   |   |   |   |   |       |   |       |   |   |   |   |   |   |   |   |   |   |   |   |   |   |     |   |   |   |   |   |   |   |   |   |   |   |   |     |
|--------|-----|---|---|---|---|---|---|---|---|---|---|---|---|---|---|---|---|---|---|---|---|---|---|---|---|---|---|---|---|---|-------|---|-------|---|---|---|---|---|---|---|---|---|---|---|---|---|---|-----|---|---|---|---|---|---|---|---|---|---|---|---|-----|
| 1uyn X | 213 | G | L | K | L | S | Q | P | L | S | D | K | A | V | L | F | A | T | A | G | V | E | R | . | D | L | N | G | R | D | Y     | T | V     | T | G | G | F | T | G | A | T | A | T | G | K | T | G | A   | R | N | M | P | H | T | R | L | V | A | G | L | 271 |
| 2x9k A | 196 | Y | L | P | L | T | L | G | . | N | H | S | V | T | P | Y | T | R | I | G | L | D | R | W | S | N | W | D | W | Q | ..... | D | ..... | D | I | E | R | E | G | A | D | F | N | R | V | G | L | 238 |   |   |   |   |   |   |   |   |   |   |   |   |     |

  

|        |     |   |   |   |   |   |   |   |   |   |   |   |   |   |   |   |   |   |   |   |   |   |   |   |      |   |   |   |   |   |   |   |   |   |   |   |   |   |   |     |   |   |     |
|--------|-----|---|---|---|---|---|---|---|---|---|---|---|---|---|---|---|---|---|---|---|---|---|---|---|------|---|---|---|---|---|---|---|---|---|---|---|---|---|---|-----|---|---|-----|
| 1uyn X | 272 | G | A | D | V | E | F | G | N | G | W | N | G | L | A | R | Y | S | Y | A | G | S | K | Q | .... | Y | G | N | H | S | G | R | V | G | V | G | Y | R | F | 308 |   |   |     |
| 2x9k A | 239 | F | Y | G | Y | D | F | Q | N | G | L | S | V | S | L | E | Y | A | F | E | W | Q | D | A | E    | G | D | S | D | K | F | H | Y | A | G | V | G | V | N | Y   | S | F | 280 |

#### 12- to 16-stranded Longest Alignment, IntNum 1395

|        |     |   |   |   |   |   |   |   |   |   |   |   |   |   |   |   |   |   |   |   |   |   |   |   |   |   |   |   |   |   |   |   |   |   |   |   |   |      |   |   |   |   |   |   |   |   |   |   |   |   |   |   |   |   |       |    |   |   |     |
|--------|-----|---|---|---|---|---|---|---|---|---|---|---|---|---|---|---|---|---|---|---|---|---|---|---|---|---|---|---|---|---|---|---|---|---|---|---|---|------|---|---|---|---|---|---|---|---|---|---|---|---|---|---|---|---|-------|----|---|---|-----|
| 2wjr A | 27  | N | G | W | W | A | S | M | E | S | N | T | W | N | T | I | H | D | N | K | K | E | N | A | A | L | N | D | V | Q | V | E | V | N | Y | A | I | K    | L | D | D | Q | W | T | V | R | P | G | M | L | T | H | F | S | ..... | 80 |   |   |     |
| 3nsg A | 147 | D | G | L | S | F | G | I | Q | Y | Q | G | K | N | Q | D | N | H | S | . | I | N | S | Q | N | G | D | G | V | G | Y | T | M | A | Y | E | F | ...D | G | F | G | V | T | A | A | Y | S | N | S | K | R | T | N | D | Q     | Q  | D | R | 202 |

  

|        |     |   |   |   |   |   |   |   |   |   |   |   |   |   |   |   |   |   |   |   |   |   |   |   |   |   |   |   |   |   |   |   |   |   |   |   |   |   |   |   |    |   |   |   |   |   |   |   |   |   |   |   |   |   |   |   |   |   |   |     |     |
|--------|-----|---|---|---|---|---|---|---|---|---|---|---|---|---|---|---|---|---|---|---|---|---|---|---|---|---|---|---|---|---|---|---|---|---|---|---|---|---|---|---|----|---|---|---|---|---|---|---|---|---|---|---|---|---|---|---|---|---|---|-----|-----|
| 2wjr A | 81  | . | . | . | N | G | T | R | G | P | Y | V | K | L | S | W | D | A | T | K | D | L | N | F | G | I | R | Y | R | Y | D | W | K | A | Y | R | Q | Q | D | L | .. | S | G | D | M | S | R | D | N | V | H | R | W | D | G | Y | V | T | Y | 135 |     |
| 3nsg A | 203 | D | G | N | G | D | R | A | E | S | R | A | V | G | A | K | Y | D | A | N | . | N | V | Y | L | A | A | V | Y | A | E | T | R | N | M | S | I | V | E | N | T  | V | T | D | T | V | E | M | A | N | K | T | Q | N | L | E | V | V | A | Q   | 261 |

|        |     |            |                |               |                |         |               |       |     |
|--------|-----|------------|----------------|---------------|----------------|---------|---------------|-------|-----|
| 2wjr A | 136 | HINSD      | FTFAWQTTLYS    | KQNDYRYANHKKW | ATENAFVLQY     | HMTDPDI | TPYIEYDYLD    | RQGVY | 195 |
| 3nsg A | 262 | QFDF       | GLRPAISYVQSKGK | QLNGAGGS      | ADLAKYIQAGATYY | FNK     | NMNVWVDYRFNLL | DEND  | 321 |
| 2wjr A | 196 | N.GRDNLS   | ENSYRIGVSE     | KL            |                |         |               |       | 214 |
| 3nsg A | 322 | YSSSYVGTDD | QAAVGITYQF     |               |                |         |               |       | 341 |

#### 14- to 22-stranded Longest Alignment, IntNum 1859

|        |     |                          |                                    |                     |                     |              |                  |      |     |
|--------|-----|--------------------------|------------------------------------|---------------------|---------------------|--------------|------------------|------|-----|
| 3bry A | 134 | LVLRVFSAAYHVT            | DKLTVGASVD                         | AVTSLNLGTL          | LDVSQIGTL           | AGQGRVSGTL   | VPTLLG           |      | 193 |
| 5fok A | 424 | KTSAAYVFD                | TLKLSE                             | QWELNLGLRYDD        | FDTKSSGYQ           | TAGRN        | .....            |      | 464 |
| 3bry A | 194 | VPGL                     | SGGYIDFSRNAPVGGGVQAWGIGGRLGLTYQVTP |                     | DTRIGAAYQAKTHVGD    | LTGQAT       |                  |      | 253 |
| 5fok A | 465 | GP...A                   | GYFK.....                          | RENNSHFWNYQTGLVYK   | PAP                 | NGSIYLAWSTSS | NPTGETG...       |      | 510 |
| 3bry A | 254 | LSAV                     | SSVAGNIPLKGDVTVRN                  | FQMPAQLTVGISHQFN.DQ | LSVSADYQRFVSSVMKDMN |              |                  |      | 312 |
| 5fok A | 511 | GEGQAD....I.SVGNN.GLDPER | NRNLELGTKWAF                       | FDD                 | ALSLNAALFR          | TDKT         | NARVASP          |      | 564 |
| 3bry A | 313 | VG                       | FVQSGSAANLDSL                      | PLQNYRDISVFGIGAERYN | NAK                 | WTFRGGFH     | YAEIPGNM....L    |      | 368 |
| 5fok A | 565 | ...DV.....               | STLQVLD                            | GEQRVQGV            | ELGFNGKI            | TEK          | WKVFGGYTYLDSEIRK | STVK | 615 |
| 3bry A | 369 | LAVVPATPT                | TSLTGGVSYA                         | IGK                 | NDVIDFALSVALR       |              |                  | 403  |     |
| 5fok A | 616 | GNKMPQTA                 | QNNFTLWTTYD                        | LLQNF               | TIGGGTTYVDK         |              |                  | 650  |     |

#### 16- to 18-stranded Longest Alignment, excluding Fig 6, IntNum 2149

|        |     |                             |                           |                 |                   |               |               |           |     |     |
|--------|-----|-----------------------------|---------------------------|-----------------|-------------------|---------------|---------------|-----------|-----|-----|
| 3nsg A | 9   | NKLDL                       | YGKAVGRHV                 | TTTTGDS....KN   | ADQTYAQIGFKGET    | QINTDL        | TGFGQWEYRT... |           | 61  |     |
| 3sys A | 7   | EDA                         | KTDLVLRNYYFN              | RDFRDHDAGKSL    | VDEWAQGFILKFSSGYT | PG.TV         | GVGLDAIGLFG   |           | 65  |     |
| 3nsg A | 62  | .KADR.....AE.....           | GEQQNSN                   | L.VRLAFAGL      | KYAEVG            | SIDYGRNYG     | IVYDVESY      |           | 106 |     |
| 3sys A | 66  | VKL                         | NSGRGTSNSELLPLHDDGRAADN   | YGRVGVA.AKLRV.S | ASELKIG           | EMLPDIPLLR.Y  |               |           | 122 |     |
| 3nsg A | 107 | TDM..APY.FSGETWGGAYTDNYMTSR | AGLLTYRN                  | SDFFGLVD        | GLSFGI            | QYQGNQDNH     |               |           | 163 |     |
| 3sys A | 123 | DDGRLLPQTFRGF.....          | AVVSRE..L....             | PGLALQ          | AGRFDAVSLRN       |               |               |           | 159 |     |
| 3nsg A | 164 | SI.....NSQ                  | NGDGVGYTMAYE              | FD..GFGVTAAYSNS | KRTNDQQDRD        | GNGDRAE       |               |           | 210 |     |
| 3sys A | 160 | SADMQDL                     | SAWSAPTQKSD               | GFNYAGAEYRFNRE  | RTQLGLWHGQLE      | D.....        | VYR           |           | 207 |     |
| 3nsg A | 211 | SRAVGAKYDA..N..             | NVYLA                     | AVYAETR         | NMSIV             | ENTVTD        | TVEMANKTQ     | NLEVVAQYQ | FD  | 266 |
| 3sys A | 208 | QSYANLLHKQ                  | RVGDW                     | TLGANLGLFVDRD   | DGAAR.....AGE     | IDSHTVYGLFSAG | IG.L          |           | 259 |     |
| 3nsg A | 267 | LRPAISYVQSKGK               | QLNG.....A.....           | GG              | ADLAKYIQAGATYY    | FN....K       | NM            |           | 306 |     |
| 3sys A | 260 | HTFYLGLQKVGGD               | SGWQSVYGSSGRSMGNDMFNGNFTN |                 | ADERSWQVRYDYDF    | VGLGW         | PGL           |           | 319 |     |
| 3nsg A | 307 | NVWVDYRFNLLDENDYSSSYVGTDD   | QAAVGITYQ                 |                 |                   |               |               | 340       |     |     |
| 3sys A | 320 | IGMVR                       | YGHGSNATTKA..GSGG         | KEWERD          | VELGYT            |               |               | 351       |     |     |

# 14- to 16-stranded Longest Alignment, IntNum 1879

|        |     |          |                           |                                |                          |                   |     |
|--------|-----|----------|---------------------------|--------------------------------|--------------------------|-------------------|-----|
| 3bs0 A | 92  | DW       | RFGAGLFVSSGLGTEY          | GSKSFLSQTENGIQTSFD             | NSSRL.IVLRAPIGFSY        | QATSKLT           | 150 |
| 4y25 A | 57  | QFSEGGKI | VRDWLAGVEWR               | SRNIWLEA..EYA...ERV            | FNHEHKPGARLSGWYD         | FNDNWR            | 111 |
| 3bs0 A | 151 |          | FGASVDLVWTSLNLELLLPS      | SQVGALTAQGNLSGGLVPSLAGFVGTG    | GAAHFSLSRNSTA            |                   | 210 |
| 4y25 A | 112 |          | IGSGLERLSHRVPLRA.....     |                                |                          |                   | 127 |
| 3bs0 A | 211 |          | GGAVDAVGWGGRLGLTY         | KLTDNTVLGAMYNFKTSVGDLEGKATLSAI | SGDG.A.V..LP.            |                   | 265 |
| 4y25 A | 128 |          | .MKNGVTGNSAQAYVRWY        | QNERRKYGVSWAF.T...D            | FSDSNQ                   | RHEVSLEGQERIWSSPY | 182 |
| 3bs0 A | 266 |          | LDGDIRVKNFEM..PASLTLGLAHQ | FNE..R                         | WVVAADIKRAYWGDVMDSMNVAFI | SQLGG             | 321 |
| 4y25 A | 183 |          | LIVDFL.PSLYYEQN           | TEHD.TPYYNP                    | IKTFDIVPAFEASHLLW        | RSYENSWEQIFSAG.VG | 239 |
| 3bs0 A | 322 |          | IDVALPHRYQDITVASIGTAYKYNN | DLTLRAGYSYA                    | QQALDSELILPVIPAYL        | KRHVTFG           | 381 |
| 4y25 A | 240 |          | ASWQKHYGTDVVTQLGYGQRISW   | NDVIDAGATLRWEKRPYDGDR.....     |                          | EHNLVVEFD         | 292 |
| 3bs0 A | 382 |          | GEYDFD                    |                                |                          |                   | 387 |
| 4y25 A | 293 |          | MTFRFR                    |                                |                          |                   | 298 |
