# Supplementary material for: Evolutionary pathways of repeat protein topology in bacterial outer membrane proteins
Source: eLife journal article supplement (doi:10.7554/elife.40308), 2018-11-29
Supplement: fig5-data1 [file elife-40308-fig5-data1-v2.pdf]

## Large Rearrangements

|              |                                                                                                        |                |  |
|--------------|--------------------------------------------------------------------------------------------------------|----------------|--|
| Int Num 317  |                                                                                                        | E-value 1.1E-6 |  |
| 1pho_A 007   | DGNKLDVYGVKVKAMHYMSDNA-S-----KDGDQSYIRFGFKGETQINDQLTGYGRWEAEFAGNKA-----ESDTAQQKTRLAFAGLKYK-DLGSFDY     | 092            |  |
| 5ldv_A 009   | AIKDVVDVSGVLRIRYDTGNFDDKNFLNNSNLNNSKQDHKYRAQVNFSAAIADNFKAFVQFDYNAVDGGTGVDNATNAEKGLFVRQLYLYTTNEDVATSVIA | 108            |  |
| 1pho_A 093   | GRNLGALYDVEAWTD-M-FPEF---G-GDSSAQTDNFM--TKRASGLATY-----RNTDFFGVIDGLNLTLYQYQK--NENRD-----               | 159            |  |
| 5ldv_A 109   | GKQQLNIIWTDNGVDGLVGTGVKVVNNSIDGLTLAAFAVDSFMAAEQGSDDLGGQSTYVGNKGNNNDSFKLDSIG--NLYGAAAVGSYDLAEGQFNPQLWL  | 206            |  |
| 1pho_A 160   | -VKKQNGDGFSTSLTYDFG---GSDFAISGAYTNSDRTNEQNLSRGTKRAEAWATGLKYDANNIYLATFYSETRKM-----T-----PI--            | 236            |  |
| 5ldv_A 207   | AYWDQVAFFYAVDAAYSTTIFDGINWTLEGAYLGNSLDSELD--DKKTYANGNLFALKGSIEVNGWDASLGGLYYGDKKASTVVIEDQGNLGSLLAGEE    | 304            |  |
| 1pho_A 237   | -T-----GGFANKTQNFEEVAQYQDFGLRPSLGIVLSKKGDIIEG-IGDEDLVNYYIDVGATYYFNKNMSAFVDYKINQLSDSNK-LNINNDIDVAVGM    | 326            |  |
| 5ldv_A 305   | IFYTTGSRNLNGDTGRNIFGYVTGGYTFNETVRVGADFVYGGTKTEATTHLGGGKKLEAVARVDYKYSPLNFSAFYSYVNLDDQGVNTNESADHSTVRLQA  | 404            |  |
| 1pho_A 327   | TYQF                                                                                                   | 330            |  |
| 5ldv_A 405   | LYKF                                                                                                   | 408            |  |
| Int Num 1308 |                                                                                                        | E-value 9.8E-6 |  |
| 2por_A 002   | VKLSGDARMGMVYNGDDW-----NFSRSRVLFTMSGTTDSGLEFGASFKAHESV-----GAETGEDGTVFLSG--AFGKIEMGDAL                 | 076            |  |
| 5ldv_A 013   | VDVSGVLRIRYDTGNFDDKNFLNNSNLNNSKQDHKYRAQVNFSAAIADNFKAFVQFDYNAVDGGTGVDNATNAEKGLFVRQLYLYTTNEDVATSVIAGKQ   | 112            |  |
| 2por_A 077   | GASEALFG--D-L-YE---VGYTDL---DDRGGNDIPYLTGDE-RLTAEDNP-----VILLYTY-SAGA-FSVAASMSDG--KVG-E-----TSEDD      | 146            |  |
| 5ldv_A 113   | LNIIWTDNGVDGLVGTGVKVVNNSIDGLTLAAFAVDSFMAAEQGSDDLGGQSTYVGNKGNNNDSFKLDSIGNLYGAAAVGSYDLAEGQFNPQLWLAYWDQV  | 212            |  |
| 2por_A 147   | AQEMAVAAAYTFG---N--YTVGLGYEKIDSPDT---ALMADMEQLELAAIAKEGATNVKAYYADGELDRD-----FARA--VF--DL--TP-VA        | 221            |  |
| 5ldv_A 213   | AFFYAVDAAYSTTIFDGINWTLEGAYLGNSLDSELDKDKTYANGNLFALKGSIEVNGWDASLGGLYYGDKKASTVVIEDQGNLGSLLAGEEIFYTTGSR    | 312            |  |
| 2por_A 222   | AAATAVDHAKYGLSVDSFTFG-ATTVGGYVQVLDLDT-----IDDVYYGLGASYDLGGGASIVGGIADNLDLP-----NSDMVADLGVKKFF           | 301            |  |
| 5ldv_A 313   | LNGDTGRNIFGYVTGGYTFNETVRVGADFVYGGTKTEATTHLGGGKKLEAVARVDYKYSPLNFSAFYSYVNLDDQGVNTNESADHSTVRLQALYKF       | 408            |  |
| Int Num 1731 |                                                                                                        | E-value 9.5E-6 |  |
| 2zfg_A 007   | DGNKVDLYGKA-VGLHYFSKNGGENS---YGGNGDMTYARLGFKGETQINSDLTGYGQWEYFQGNNS---GADAQTGNKTRLAFAGLKYA-DVGSFDY     | 098            |  |
| 5ldv_A 009   | AIKDVVDVSGVLRIRYDTGNFDDKNFLNNSNLNNSKQDHKYRAQVNFSAAIADNFKAFVQFDYNAVDGGTGVDNATNAEKGLFVRQLYLYTTNEDVATSVIA | 108            |  |
| 2zfg_A 099   | GRNYGVVYDALG-YT-DMLPEFGGDTA-YSD----DFF--VGRVGGVAT-----YRNSNFGLVDGLNFAVQYLGK--NERDT-----                | 165            |  |
| 5ldv_A 109   | GKQQLNIIWTDNGVDGLVGTGVKVVNNSIDGLTLAAFAVDSFMAAEQGSDDLGGQSTYVGNKGNNNDSFKLDSIG--NLYGAAAVGSYDLAEGQFNPQLWL  | 206            |  |
| 2zfg_A 166   | -ARRSNGDGVGGSISYIE---GFGIVGAYGAADR TNLQEAQPLGNKGKAEQWATGLKYDANNIYLAANYGETRNA-----TPI--TNKFT-           | 245            |  |
| 5ldv_A 207   | AYWDQVAFFYAVDAAYSTTIFDGINWTLEGAYLGNSLDSELD--KKTYANGNLFALKGSIEVNGWDASLGGLYYGDKKASTVVIEDQGNLGSLLAGEE     | 304            |  |
| 2zfg_A 246   | ----N--TSGFANKTQDVLLVAQYQDFGLRPSIAYTKSKAKDVEG-IGDVLNYYFEVGATYYFNKNMSTYVDYIINQLSDSNK-LGVGSDDTVAVGI      | 336            |  |
| 5ldv_A 305   | IFYTTGSRNLNGDTGRNIFGYVTGGYTFNETVRVGADFVYGGTKTEATTHLGGGKKLEAVARVDYKYSPLNFSAFYSYVNLDDQGVNTNESADHSTVRLQA  | 404            |  |
| 2zfg_A 337   | VYQF                                                                                                   | 340            |  |
| 5ldv_A 404   | LYKF                                                                                                   | 408            |  |
| Int Num 2194 |                                                                                                        | E-value 3.7E-9 |  |
| 3nsg_A 005   | NKDGNKLDLYGKAVGRHVWTTTGDSK-----NADQTYAQIGFKGETQINTDLTGFGQWEYRTKADRAE-----GEQQNSNLVRLAFAGLKY--AEVGS     | 090            |  |
| 5ldv_A 007   | EEAIKDVVDVSGVLRIRYDTGNFDDKNFLNNSNLNNSKQDHKYRAQVNFSAAIADNFKAFVQFDYNAVDGGTGVDNATNAEKGLFVRQLYLYTTNEDVAT-S | 105            |  |
| 3nsg_A 091   | IDYGRNYGIVYDVESYTDMAPIYFSGET-----WGGA-----YTDNYMTSRAGG-----LLTYRNSDFGLVDGLSFGIYQYQGN--                 | 159            |  |
| 5ldv_A 106   | VIAGKQQLNIIWTDNGVDG-LVGTGVKVVNNSIDGLTLAAFAVDSFMAAEQGSDDLGGQSTYVGNKGNNNDSFKLDSIGNL-----YGAAAVGSYDLAEG   | 197            |  |
| 3nsg_A 160   | QDNHS-----INSQNGDGVGYTMAEYFD-----GFGVTAAYSNSKRTNDQQDRDNGDRAESRAVGAKYDANNVYLAAVYAETRNMS-----IVENT       | 241            |  |
| 5ldv_A 198   | GQFNPQLWLAYWDQVAFFYAVDAAYSTTIFDGINWTLEGAYLGNSLDSELD--KKTYYANGNLFALKGSIEVNGWDASLGGLYYGDKKASTVVIEDQGNL   | 296            |  |
| 3nsg_A 242   | ----V-----TD---TVEMANKTONLEVVAAQYQDFGLRPAISYVQSKGQLNGAGGSADLAKYIQAGATYYFNKNMNVVVDYRFLNLLDENDYSSSYVG    | 328            |  |
| 5ldv_A 297   | GSLLAGEEIFYTTGSRNLNGDTGRNIFGYVTGGYTFNETVRVGADFVYGGTKTEATTHLGGGKKLEAVARVDYKYSPLNFSAFYSYVNLDDQGVNT-NESA  | 395            |  |
| 3nsg_A 329   | TDDQAAVGITYQF                                                                                          | 341            |  |
| 5ldv_A 396   | DHSTVRLQALYKF                                                                                          | 408            |  |
| Int Num 2866 |                                                                                                        | E-value 1.1E-8 |  |
| 4d65_A 008   | GNKLDVYQIDVRHYFADAKSGE-----DGDDSRVRLGFKGDTQITDQLIGFGRFEWETSTNKA-----ETSNDNQNRLAYAGLKFA-DYGSLLDYG       | 092            |  |
| 5ldv_A 010   | IKDVVDVSGVLRIRYDTGNFDDKNFLNNSNLNNSKQDHKYRAQVNFSAAIADNFKAFVQFDYNAVDGGTGVDNATNAEKGLFVRQLYLYTTNEDVATSVIAG | 109            |  |

|        |     |                    |                       |                                                          |                                      |     |
|--------|-----|--------------------|-----------------------|----------------------------------------------------------|--------------------------------------|-----|
| 4d65_A | 093 | RNYGV              | VIYDTNAWTDVLP         | WLGADT-----M-DQ-ED--TF--MMGRNRN-L--L-----TYRNNNGFGYIDG-L | SFALQYQGKN--GDQNKSTG                 | 163 |
| 5ldv_A | 110 | KQQLNIIWTDNGVDG-LV | GTGVKVVNNSID          | GLTLAAFAVDSFMAAEQGSDDLQGQSTYVGNKGNNNDSFKLDS---           | IGNLYGAAAVGSYDLA                     | 205 |
| 4d65_A | 164 | SSALDNN            | GDGYGFSTAYELG---      | WGLSIGGGYSNSSRTPSQNNIKTGATGKRAEAWN                       | VGSKLELDEL                           | 245 |
| 5ldv_A | 206 | LAYWD              | QVAFFYAVDAAYSTTIFDGIN | NWTLLEGAYLGNSLDSELD                                      | ---KTTYANGNLFALKGSIEVNGWDASLGGLYYGDK | 302 |
| 4d65_A | 246 | -----D---          | AEAIANKTENLEL         | VALYSFDFGLTPSIGYNQSKGK                                   | NLGN-YGNKDLVKYIAVGASYDE              | 335 |
| 5ldv_A | 303 | EEIFYTTGSRLNGDT    | GRNIFGYVTGGYTFNET     | VRVGADFVYGGTKTEATTHLGGGKKLEAVARVDYKYS                    | PKLNFSAFYSYVNL                       | 400 |
| 4d65_A | 336 | GLGLIYQF           | 343                   |                                                          |                                      |     |
| 5ldv_A | 401 | RLQALYKF           | 408                   |                                                          |                                      |     |

Int Num 3213  
E-value 4.1E-9

|        |     |                |                                |                                                 |                                      |                            |     |
|--------|-----|----------------|--------------------------------|-------------------------------------------------|--------------------------------------|----------------------------|-----|
| 5fvn_A | 005 | NKDGNK         | LDLYGKVDGLHYFSDDDSQ-----       | DGDQTYMRLGFKGETQ                                | NDQLTGYGQWEYQIQGNSG-----             | E-NENNSWTRVAFAGLKF--GDAGS  | 087 |
| 5ldv_A | 007 | EEAIKDV        | DVSGVLRIRYDTGNF                | DKNFLNNSNLNNSKQDHKYRAQVNFSA                     | AIADNFKAFVQFDYNAVDGGTGVDNATNAE       | GLFVRQLYLTYNEDVAT-S        | 105 |
| 5fvn_A | 088 | FDYGRNY        | GVVDVTSWTD--VLPEFG--           | GDTYGS--D-NF--MQQRGN-G--FA-----                 | TYRNSDFFG                            | LDVG-LNFAVQYQGKNGSASGED    | 160 |
| 5ldv_A | 106 | VIAGK          | QQLNIIWTDNGVDGLVGTGVKVVNNSID   | GLTLAAFAVDSFMAAEQGSDDLQGQSTYVGNKGNNNDSFKLDSI--- | IGNLYGAAAVGSYDLA                     | GGQFNF                     | 202 |
| 5fvn_A | 161 | QTNNGR         | TELRQNGDGVGGSITYNLG--E--       | GFGIGTAVSSSKRTSSQNDLTYGNGDRAET                  | YTGGKLYDANNIYLAAQYTQTYNA-----        | TRV--                      | 243 |
| 5ldv_A | 203 | QLW--          | LAYWDQVAFFYAVDAAYSTTIFDGIN     | NWTLLEGAYLGNSLDSELD                             | ---KTTYANGNLFALKGSIEVNGWDASLGGLYYGDK | KEASTVVIEDQGNLGS           | 298 |
| 5fvn_A | 244 | --G-----N----- | LGWANKAQNFEVVAQYQFDFGL         | RPSVAYLQSKGKDL                                  | LENGYGDQDLKYVDVGATYYFNK              | NMSTYVDYKINLLDDKEFTRNAGIST | 330 |
| 5ldv_A | 299 | LLAGEE         | IFYTTGSRLNGDTGRNIFGYVTGGYTFNET | VRVGADFVYGGTKTEATTHLGGGKKLEAVARVDYKYS           | PKLNFSAFYSYVNL                       | DQGVNT--NESAD              | 396 |
| 5fvn_A | 331 | DD             | IVALGLVYQF                     | 332                                             |                                      |                            |     |
| 5ldv_A | 397 | HSTVRL         | QALYKF                         | 408                                             |                                      |                            |     |

Int Num 3231  
E-value 8.3E-9

|         |     |                                 |                                                |                                       |                                      |                                |          |     |
|---------|-----|---------------------------------|------------------------------------------------|---------------------------------------|--------------------------------------|--------------------------------|----------|-----|
| 5nxxr_A | 006 | KDGNK                           | LDVYGKVDVRHYFASADK                             | GKKS-----EDGDDSRVRLGVKGD              | QTIDQLTGFRFEWE                       | TKNKA-----ENEGENKNRLAYAGLKFA-D | FGSID    | 093 |
| 5ldv_A  | 008 | EAIKDV                          | DVSGVLRIRYDTGNF                                | DKNFLNNSNLNNSKQDHKYRAQVNFSA           | AIADNFKAFVQFDYNAVDGGTGVDNATNAE       | GLFVRQLYLTYNEDVATSVI           |          | 107 |
| 5nxxr_A | 094 | YGRNYG                          | VVYDTNAWTD--VFPLW--                            | GADTMA-----QTDNFM                     | TSRNRN-L--L-----TYRNNNAFGYVDG-L      | SFALQYQGKN                     | GDNNKSSA | 166 |
| 5ldv_A  | 108 | AGKQQLNIIWTDNGVDGLVGTGVKVVNNSID | GLTLAAFAVDSFMAAEQGSDDLQGQSTYVGNKGNNNDSFKLDS--- | IGNLYGAAAVGSYDLA                      | GGQFNF                               |                                |          | 203 |
| 5nxxr_A | 167 | ---GMAKD                        | NGDGYGFSTAYELG---                              | GVTILGGGYSNSSRTPNQKAGVVTSE            | SGDYSYATGKRAQAWN                     | VGGKFANNVYLAAMYQGTQNT-----     |          | 249 |
| 5ldv_A  | 204 | LWLAYWD                         | QVAFFYAVDAAYSTTIFDGIN                          | NWTLLEGAYLGNSLDSELD                   | ---KTTYANGNLFALKGSIEVNGWDASLGGLYYGDK | KEASTVVIED                     |          | 292 |
| 5nxxr_A | 250 | -SRY-----GD-----                | LDLIANKTENVELVAQYIFDFGL                        | KPSIGYNQSKGKNLNGYDN                   | QDLVKYISVGSYYYFNK                    | NMSAVVDYKINLLKDNDFTK           |          | 334 |
| 5ldv_A  | 293 | QGNLGS                          | LLAGEEIFYTTGSRLNGDTGRNIFGYVTGGYTFNET           | VRVGADFVYGGTKTEATTHLGGGKKLEAVARVDYKYS | PKLNFSAFYSYVNL                       | DQGVNT--                       |          | 391 |
| 5nxxr_A | 335 | EYGINTDN                        | VLGLGLVYQF                                     | 352                                   |                                      |                                |          |     |
| 5ldv_A  | 392 | -NESADHSTVRL                    | QALYKF                                         | 408                                   |                                      |                                |          |     |

## Loop to hairpin

Int Num 372  
E-value 4.6E-4

|        |     |         |                    |                               |                                         |                              |        |    |     |
|--------|-----|---------|--------------------|-------------------------------|-----------------------------------------|------------------------------|--------|----|-----|
| 1prn_A | 161 | TEEF    | GIAADWSND-----MI   | SLAAAYTTDAGG-----IVDND        | IAFVGAAAYKFNDAGTVGLN                    | WYDNLSTAGDQVTLYGNYAF--GAT-TV | RAYVSD | ID | 245 |
| 3sy7_A | 210 | VRQYYL  | NSNYTIPLASDQSLGF   | DFNIYRTNDEGAKAGDISNTTWSLAAAYT | LDLDAH-TFTLAYQKVHGDQ-PFDYIGFGRNGSGAGGDS | SIFLANSVQ                    | SD     |    | 307 |
| 1prn_A | 246 | R-AGADT | AYGIGADYQFA---     | EGVKVSGSVQSG                  | 274                                     |                              |        |    |     |
| 3sy7_A | 308 | FNGP    | GKESWQARYDLNLASYGV | PGLTFMVR                      | YING                                    | 341                          |        |    |     |

Int Num 380  
E-value 6.7E-4

|        |     |        |                      |                                     |                                     |              |                    |     |
|--------|-----|--------|----------------------|-------------------------------------|-------------------------------------|--------------|--------------------|-----|
| 1prn_A | 190 | DND    | IAFVGAAAYKFNDAGTVGLN | WYDNLSTAGDQVTLYGNYAFG--ATTV-R-AYVSD | IDRAGADTAYGIGADYQFA---              | EGVKVSGSVQSG | 274                |     |
| 3szd_A | 248 | DNRTVS | ALFSARYGLH-TLYLGLQK  | VS                                  | GDD---G---WMRVNGTSGGTLANDSYNASYD-NP | GERSWQLRYDF  | FVGLGLPGLTFMTRYLHG | 331 |

Int Num 385  
E-value 6.7E-4

|        |     |        |                       |                                 |                                        |                      |                             |        |          |     |
|--------|-----|--------|-----------------------|---------------------------------|----------------------------------------|----------------------|-----------------------------|--------|----------|-----|
| 1prn_A | 160 | VTE    | EF                    | GIAADWSNDMI                     | SLAAAYTTDAGGIVDND                      | IAFVGAAAYKFNDAGTVGLN | WYDNLSTAGDQVTLYGNYAFG--A-TV | RAYVSD | IDR----- | 247 |
| 3t0s_A | 244 | DNRRNL | NAMLTIRAGAHAFGIGVQ    | KMIGN---DAFPVLNGYT-TPY-VANILMAQ | YTFTR-PQEKSWQLRYDYDFAGLGLPGLNLMTRYVQGR | IDR                  | GAGR                        |        | 336      |     |
| 1prn_A | 248 | -AGADT | AYGIGADYQFA---        | EGVKVSGSVQSG                    | 274                                    |                      |                             |        |          |     |
| 3t0s_A | 337 | ADD    | SEWERNTDLSYVIQSGPLKSV | ALKWRNITY                       | 369                                    |                      |                             |        |          |     |

Int Num 395  
E-value 1.0E-3

|        |     |       |                      |                           |                            |                         |                      |              |     |
|--------|-----|-------|----------------------|---------------------------|----------------------------|-------------------------|----------------------|--------------|-----|
| 1prn_A | 190 | DND   | IAFVGAAAYKFNDAGTVGLN | WYDNLSTAGDQVTLYGNYAFGA-TV | RAYVSD                     | IDR-AGADTAYGIGADYQFA--- | EGVKVSGSVQSG         | 264          |     |
| 4frx_A | 280 | DNRAF | SGLFTTYT             | VS                        | GH-SIGAGYQILNGDSDF-PFLNR-G | BEGEGSTAYLITDVQIGKFQ    | RAGERTWQVRYGYDFATVGV | PGLTFNTIYLSG | 367 |

Int Num 910  
E-value 2.8E-4

2fgr\_A 168 VGRYIGGYVAYDNGPLSASLGLAQQKTAVGGLATDRDEITLGASYNFGVAKLSGLLQQTQKFRDIGGDIKTNSYMLGASAPVG---GVGEVKLQYALYD 267  
4frx\_A 280 DNRAFSGLFTYTVSGHSIGAGYQILNGSD-----FPFLNRGDG-EGSTAYLITDVQIGKF-----QRAGERTWQVRYGYDFAATVGVPGLTFNTIYLSGD 370

2fgr\_A 266 QKA---IDSKAHQITLGIVHNLNLS-----KRTALYGNLAFLKND 299  
4frx\_A 369 KIKTARGDQSEWERDISLAYVIPDGTFKGLGFTWKNASFRSGL 279

Int Num 922  
E-value 6.8E-4

2fgr\_A 168 VGRYIGGYVAYDNGPLSASLGLAQQKTAVGGLATDRDEITLGASYNFGVAKLSGLLQQTQKFRDIGGDIKTNSYMLGASAPVG---GVGEVKLQYALYD 261  
5dl5\_A 274 TNNIWAISGTYATGPHSVMLAYQQNTGNVG-----Y-DYGQ-NA--DGFQSIYLPNSYMSDF-----IGNHEKSAQIQYNVDFGKLGVLPLNLTWTFVY 359

2fgr\_A 262 YDQ-KA---IDSKAHQITLGIVHNLNLS-----KRTALYGNLAFLKND 299  
5dl5\_A 360 GWDIKVRNVTTDDAQEREFFNQVKYTVQSGFAKDAFLRIRNSYRASD 273

Int Num 2791  
E-value 2.8E-5

4aui\_A 017 AMADVTLTYGTIKAGVETSRSAHHAQAQDRVKTATEIADLGSKIGKQEDLGNGLKAIWQLEQKAYVSG-----TDTGWGNRQSFGLKQ--GFGK 106  
5ldv\_A 009 AIKVDVDSGVLRYRYDTGNFDKNFL--NNSNLNNSK--QDHKYRAQVNFSAAIADNFKAFVQFDYNAVGGTGVNDATNAEKGLFVRQLYLYTNTEDVATS 105

4aui\_A 107 VRVGRLLNN--ILKDT---GNFNP-----WEGKSY-SGLSNIAQ--PEE-----R-HVS---VRIDSP-EFAGFSGSVQ 162  
5ldv\_A 106 VIAGKQQLNIWTDNGVDGLVGTGVKVVNNSIDGLTLAAFAVDSFMAAEQGSDDLQGSYTVNGKNNNSFKLDSIGNLYGAAAVGSYDLAEGQFNPQLW 205

4aui\_A 163 VVPNDNSGKNRSESYHAGFNKYND---EFFVQYAGSYKRNYT-----TEKHQVHRLVGGYDHDALYASVAVQQQDAKL-----T-WRD---D 238  
5ldv\_A 206 LAYWE---QVAFYAVDAAYSTTIFDGINWTLLEGAYLGNSLDSELDKKTYSANGNLFALKGSIEVNGWDASLGGLYGDKEKASTVVIEDQGNLGLLA 301

4aui\_A 239 N-----SHNSQTEVATTVAIRFG-NVTPRVSYAHGFKGSVYD-ADHDNTYDQVVVGAEXDFSKRTSALVSAGWLQKKGAE---KFWATVGG 320  
5ldv\_A 302 GEEIFYTTGSRNLNGDTGRNIFGYVTGGYTFNETVRVGADFVYGGTKTEATHTLGGGKKLEAVARVDYKSPKLNFSAFYSYVNLDDQGVNTNESADHSTVR 401

4aui\_A 321 VGLRHKF 327  
5ldv\_A 402 LQALYKF 408

Int Num 2965  
E-value 1.2E-4

6ehb\_A 181 GEDGYSLSAIYTFGDTGFNVGAGYADQDDQNEYMLAASYRMEN-LYFAGLFTDGELAKDVDYTGYLEAAGYKLG---Q-AAFTATYNNAE TAK-----K 269  
4fso\_A 258 DNRAISLLLAYAQG--GHTLSAGWQRMNGASSM----PYLDGSNPLYANYLQVNDF-ANPEERSWQLRYDFDLRSVGVPGLSFMTRYVNGDHIRLANGDE 350

6ehb\_A 270 TSADNFAIDATYYFK----PNFRSYISYQFNLLSDSKASKVASEDELAIGLRYDF 320  
4fso\_A 351 GKWERDIELKYIVQSGRFKDLRLRLNATYRTDFER--SARDVDEVRLIASYNL 403

Int Num 2983  
E-value 1.9E-4

6ehb\_A 181 GEDGYSLSAIYTF-GDTGFNVGAGYADQDDQNEYMLAASYRME--NLYFAGLFTDGELAKDVDYTGYLEAAGYKLGQ-----AAFTATYNNAE TAK----- 268  
4fsp\_A 262 DNRSFSGSLTYRLRN--GQAFGLGYQRMNGDHF----PYLEGTDPLYLVNF-GQYNDF-AEAGESSWQLRYDCDFAPLGVPLGLSLMTRYFSGHGAKPKGA 353

6ehb\_A 269 -KTSADNFAIDATYYFK----PNFRSYISYQFNLLSDSKASKVASEDELAIGLRYDF 320  
4fsp\_A 354 DGSREWERDSDLRYVLQGGALKGLGLVWRNATYRSF-----SRDIDENRLYLYTEL 405

Int Num 3159  
E-value 5.1E-4

6ehb\_A 181 GEDGYSLSAIYTFGDTGFNVGAGYADQDDQNEYMLAASYRMENLY-F-AGLFTDGELAKDVDYTGYLEAAGYKLG---Q-AAFTATYNNAE TA----- 245  
5dl6\_A 187 DNDLYHAHFEKHKQ--NHKFIFGTFQHHGDTAF----PYLTGGETGLLIDTWP-GEF-LNPKEKAYSFRYEYDKEYVPGLCFMTRYTGHNIYAPNLGG 305

6ehb\_A 246 KKTSAADNFAIDATYYFK----PNFRSYISYQFNLLSDSKASKVASEDELAIGLRYDF 298  
5dl6\_A 306 TNLKEREIDFDLGYTVQSGWLKNLGLRLARYAIYDNMMLSTANIKPVNETRINIDYTW 362

Int Num 3235  
E-value 7.0E-9

6ehd\_A 005 KSDAGTVDFYQGLRTELKFLFLEDKDP-----TIGSGSSRAGVDANYTVNDSLALQGVKVEFLKDS-----GDMYVRNHILGVKT--NFGKF 082  
5ldv\_A 007 EEAKIDVDVSGVLRYRYDTGNFDKNFLNNSNLNNSKQDHKYRAQVNFSAAIADNFKAFVQFDYNAVGGTGVNDATNAEKGLFVRQLYLYTNTEDVATS 106

6ehd\_A 083 SFGKQWTT--SDDV--Y-G-AD---YSY-FFGGTGLR--Y-G--TLSDA-----LHDSQ---VKYVY--EADSFVWKAGY 137  
5ldv\_A 107 IAGKQQLNIWTDNGVDGLVGTGVKVVNNSIDGLTLAAFAVDSFMAAEQGSDDLQGSYTVNGKNNNSFKLDSIGNLYGAAAVGSYDLAEGQFNPQLWL 206

6ehd\_A 138 GFPEDNAKQELAELYVGAFTF--G-DLAVHAGGGQNRDAKFKVGSNTVGTTTIDIKADVNTNSYFEVTGEYTGIDALIGVTTYNAELD-----V-- 221  
5ldv\_A 207 AYWDQ--VAFYAVDAAYSTTIFDGINWTLLEGAYLGNSLDSELD-----DKKTYANGNLFALKGSIEVNGWDASLGGLYGDKEKASTVVIEDQGNL 296

6ehd\_A 222 ----EN-----NPLVIDEDAISVAGTYKVADKTKLYAGYEYVMQEANT--GADEDGTLVLYLVGEYKFASWARVYAEYGYGDGTTLYGNTKGS 303  
5ldv\_A 297 GSLLAGEEIFYTTGSRNLNGDTGRNIFGYVTGGYTFNETVRVGADFVYGGTKTEATHTLGGGKKLEAVARVDYKSPKLNFSAFYSYVNLDDQGVNT----- 391

6ehd\_A 304 AEVKATKVDSANNFGIGARYYW 325  
5ldv\_A 392 ----NESADHSTVRLQALYKF 408

## Loop to hairpin with alternate alignments

Int Num 378 - Loop to hairpin

E-value 1.9E-4

```
1prn_A 190 DNDIAFVGAAAYKFNDAGTVGLNWDNGLSTAGDQVTLYGNYAFGAT--TVRAYVSDIDR-AGADTAYGIGADYQFA---EGVKVSGSVQSG 274
3sys_A 245 DSHTVYGLFSAGIGLH-TFYLGLQKVGGDS-----GWQSVYGSGRSMGNDMFNGNFTNADERSWQVRYDYDFVGLGWPGLIGMVRVYGHG 328
```

Int Num 379 - Alternate alignment, also loop to hairpin

E-value 2.8E-4

```
1prn_A 160 VTEFGIAADWSNDMISLAAAYTTDAGGIVDNDIAFVGAAAYKFNDAGTVGLNWDNGLS-TAGDQVTLYGNYAFG---A-TTVRAYVSDIDR----- 246
3sys_A 245 DSHTVYGLFSAGIGLH-TFYLGLQKVGGDS--GWQSVYG-SS---GR-SMGNDMFNGNFTNADERSWQVRYDYDFVGLGWPGLIGMVRVYGHGNSNATTKAGS 337

1prn_A 247 AGADTAYGIGADYQFA---EGVKVSGSVQSG 274
3sys_A 338 GGKEWERDVELGYTVQSGPLARLNVRLNHASN 369
```

Int Num 1628 - Loop to hairpin

E-value 9.1E-5

```
6ehb_A 181 GEDGYSLSAIYTFGDTGFNVGAGYADQDDQNEYMLAASYRME--NLYFAGLFTDGELAKDVDYTGYLEAAGYKLG---Q-AAFTATYNNAE TAK----- 268
2y0l_A 256 DNKSLNGMFTYSLG--NHAFGAAWQRMNGDDAF----PYLEGSNPYLVNFV-QVNDF-AGPKERSWQLRYDYDFVGLGLPGLTFMTRYVKGDNVELAGQS 347

6ehb_A 269 -KTSADNFAIDATYYFK----PNFRSYISYQFNLLDSKASKVASEDELAIGLRYDF 320
2y0l_A 348 GEGREWERNTLQVVFQSGALKNLGIRWRNATFRSNF-----TRDIDENRLIVSYTL 399
```

Int Num 1627 - alternate alignment

E-value 1.0E-5

```
6ehb_A 182 EDGYSLSAIYTFGDTGFNVGAGYADQDDQNEYMLAASYRME--NLYFAGLFTDGELAKD---DVDYTGYLEAAGYKLGQAFTATYNNAE TAK--- 268
2y0l_A 189 DHFDLGGLDYKLT-DLTASYHYHSLQDVYRQHFVGLLHWPPIGPELTSDLRFARSTDGSAKAGGIDNKSLNGMFTYSLGNHAFGAAWQRMNGDDAF 287

6ehb_A 269 -----KTSADNFAIDATYYFK----PNFRSYISYQFNLLD 299
2y0l_A 288 YLEGSNPYLVNFVQVNDFAGPKERSWQLRYDYDFVGLGLPGLTFMTRYVKGDNV 341
```

Int Num 2550 - loop to hairpin

E-value 1.5E-4

```
6ehb_A 181 GEDGYSLSAIYTFGDTGFNVGAGYADQDDQNEYMLAASYRME--NLYFAGLFTDGELAKDVDYTGYLEAAGYKLG---Q-AAFTATYNNAE TAK----- 268
3szv_A 256 DNRAFGALFSLRLG--AHAVAAGYQRISGDDPYP---YIAGSDPYLVNF-IQIGDF-GNVDERSWQLRYDYDFGALCLPGLSFMSRVVSGD NVARGAAN 347

6ehb_A 269 KTSADNFAIDATYYFK----PNFRSYISYQFNLLDSKASKVASEDELAIGLRYDF 320
3szv_A 348 DGKEWERNTDLGYVQSGPLKNLGKWRNATVRSNF-----ANDIDENRLILSYSL 398
```

Int Num 2551 - alternate alignment

E-value 2.8E-5

```
6ehb_A 181 GEDGYSLSAIYTFGDTGFNVGAGYADQDDQNEYMLAASYRME--NLYFAGLFTDGELAKD---DVDYTGYLEAAGYKLGQAFTATYNNAE TAK--- 268
3szv_A 189 SDAFDFAGGDRYLTTP-ALTASLHQRLNDIYRQTFAGLVHTLDLGGQRLSKSDLRFRASEDGGFRELDNRAFGALFSLRLGAHAVAAGYQRISGDDPYP 287

6ehb_A 269 -----KTSADNFAIDATYYFK----PNFRSYISYQFNLLDS 300
3szv_A 288 YIAGSDPYLVNFIQIGDFGNVDERSWQLRYDYDFGALCLPGLSFMSRVVSGDNVA 342
```

Int Num 2948 - Loop to hairpin

E-value 1.0E-3

```
6ehb_A 180 NGEDGYSLSAIYTFGDTGFNVGAGYADQDDQNEY-MLAASYRM-ENLYFAGLFTDGELAKDVDYTGYLEAAGYKLGQ-----AAFTATYNNAE TAK--- 268
4frx_A 279 VDNRAFGSLFTYTVS--GHSIGAGYQILNGDSDFPFLNRGDGEGSTAYLITDVQIGKF-QRAGERTWQVRYGYDFATVGVPGLTFNTIYLSGDKIKTARG 375

6ehb_A 269 KTSADNFAIDATYYFK----PNFRSYISYQFNLLDSKA---SKVASEDELAIGLRYDF 320
4frx_A 376 DQSEWERDISLAYVIPDGTFFKGLGFTWKNASFRSGLPAAGSSNNQRDQDENRLIVSYTL 434
```

Int Num 2947 - alternate alignment

E-value 4.1E-4

```
6ehb_A 181 GEDGYSLSAIYTFGDTGFNVGAGYADQDDQNEYMLAASYRM--E--NLYFAGLFTDGELAKD---DVDYTGYLEAAGYKLGQ-----AAFTATYNNAE TAK 250
4frx_A 192 SNKFYYAGGDYKVNK-DLTLLQYYYGNLDFYKQHFGLLIHNWQIGPGVLKTDLRAFDSSSDGKNRSRSGRADGYVSSGYGSGVTKGEVDNRAFGSLFTY 290

6ehb_A 251 XLGQAFTATYNNAE TAK-----KTSADNFAIDATYYFK----PNFRSYISYQFNLLDS 300
4frx_A 291 TVSGHSIGAGYQILNGSDFPFLNRGDGEGSTAYLITDVQIGKFRACERTWQVRYGYDFATVGVPGLTFNTIYLSGDKIK 371
```

Int Num 3173 - Loop to hairpin

E-value 1.5E-4

```
6ehb_A 181 GEDGYSLSAIYTFGDTGFNVGAGYADQDDQNEYMLAASYRME--NLYFAGLFTDGELAKDVDYTGYLEAAGYKLGQ-----AAFTATYNNAE TAK 267
5dl7_A 263 DNRHISGLFGLNYQ--NHTVSLGYMQSFGSTGL-----PFLSGTESPPVLD--FMSSDY-SNKDEKVYSIRYEYDFKNAIRIGDVSINGLRFMTRYAKGEDI 353
```

6ehb\_A 268 K-----KT**SADNFAIDATYYF**K---P**NFRSYISYQFN**LLSDKASKVASE**ELAIGLRYDF** 320  
5dl7\_A 354 **ILLQYGDQRFKEDSLEFDLG**YKIPEGKLG**LGMRRARFSHYRND**MPTNMTFHS**ANETRLNVDYTF** 417

Int Num 3174 - alternate alignment

E-value 7.4E-5  
6ehb\_A 181 **GEDGYSLSAIYTF**GD**TGFNVGAGYAD**QDD-Q**NEYMLAASYRME**-----**NLYFAGLFTD**GELAK-----**VDY**TGYELAAGYKL**GQA**AFTATYN**NAETAK**- 268  
5dl7\_A 195 **TDSFYTLGGSYQLK**--**DYRLRAYHAELE****DIYQQQFLGFNGKQPLNDQ****LNFLSDVRFFNSEE**TGSKKIGE**VDNRHISGLFGLNYQ****NHTVSLGYMQSFGSTG** 292  
  
6ehb\_A 269 -----KT**SADNFAIDATYYFKP**-----**NFRSYISYQFN**LLDS 300  
5dl7\_A 293 LPFLSGTESPVVLD**FMSSDYSNKDEKVYSIRYEYDFKNA**RIGDVS**LNGLRFMTRYAKGEDID** 354
